# Supplementary material
Source: MDPI journal article supplement (https://www.mdpi.com/2077-0472/10/5/164)
Supplement: s1 [file s1]

### Supplementary information

N. Kerebba <sup>a</sup>, A.O. Oyedeji <sup>b</sup>, R. Byamukama <sup>c</sup>, S.K. Kuria <sup>d</sup>, O.O. Oyedeji<sup>a,\*</sup>

<sup>a</sup> *Department of Chemistry, University of Fort Hare, P/BagX1314, Alice 5700, South Africa*

<sup>b</sup> *Department of Chemical and Physical Sciences, Walter Sisulu University, P/BagX1, Mthatha 5117, South Africa*

<sup>c</sup> *Department of Chemistry, Makerere University, P.O. Box 7062, Kampala, Uganda*

<sup>d</sup> *Department of Biological and Environmental Sciences, Walter Sisulu University, P/BagX1, Mthatha 5117, South Africa*

\*Corresponding Author email: [ooyedeji@ufh.ac.za](mailto:ooyedeji@ufh.ac.za)

**Figure S1: GC- Chromatogram for the standard mixture of compounds**

Scan Range: 1 - 12040 Time Range: 3.82 - 55.00 min.

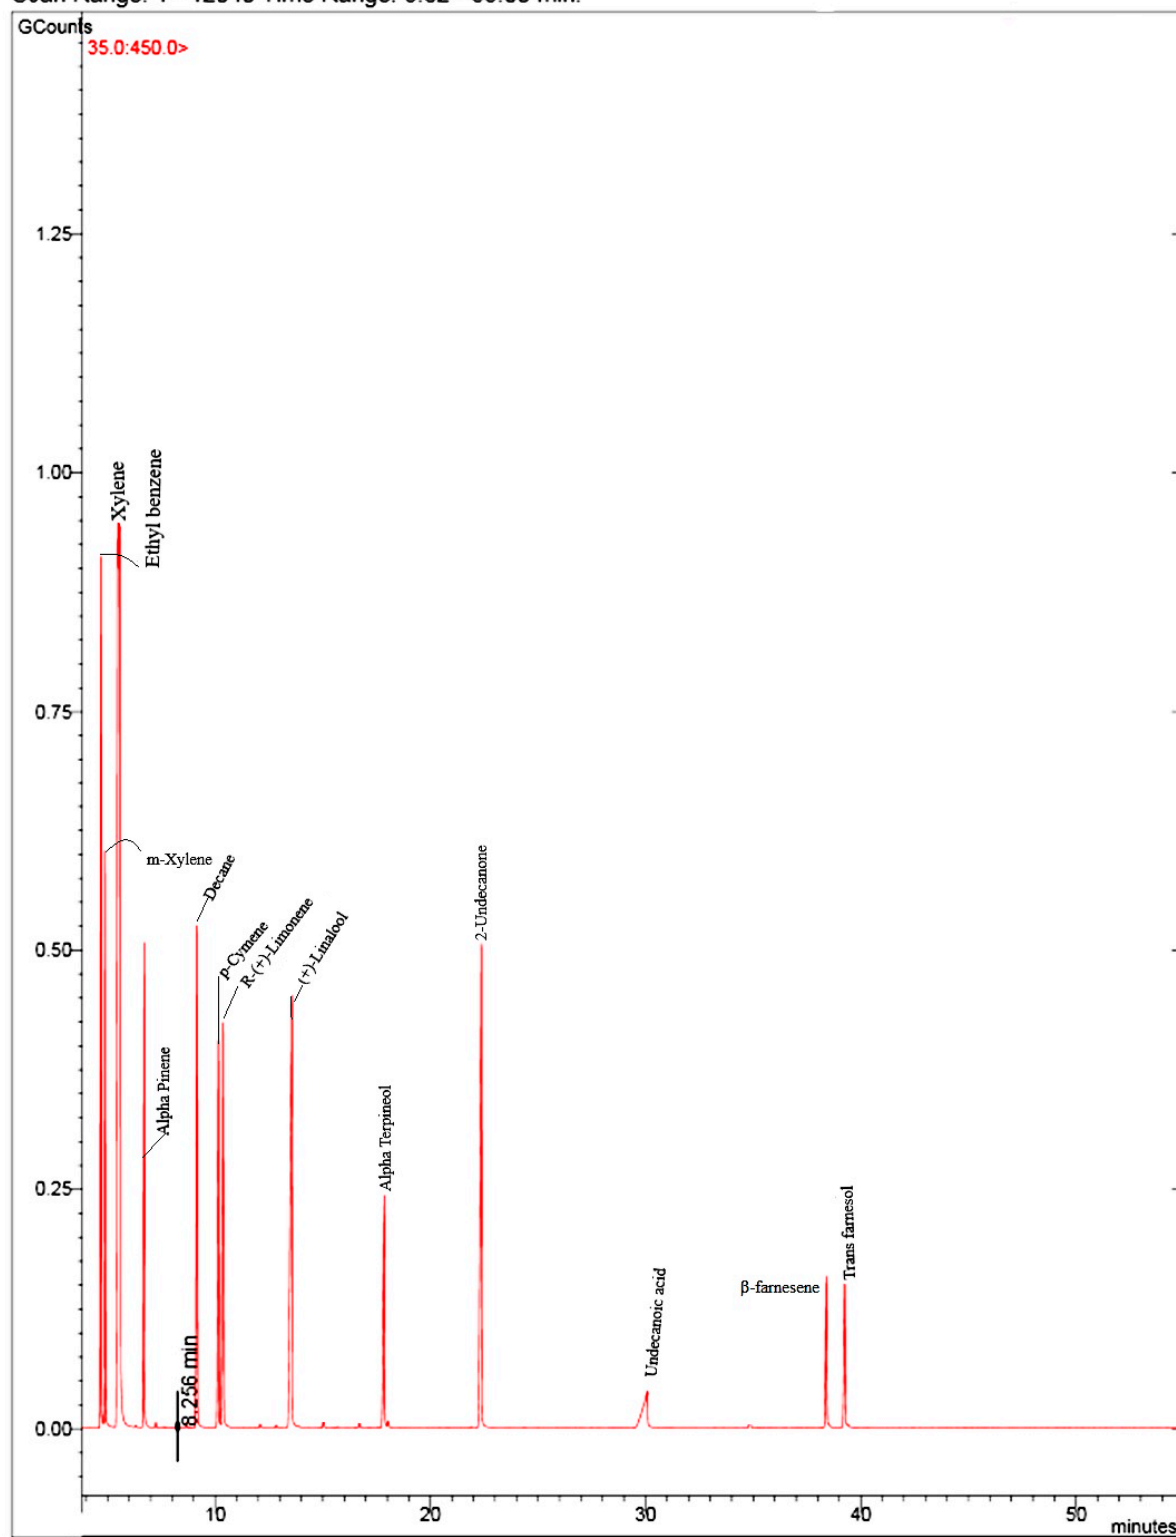

**Table S1: Loading score of extracted principal components**

|                                                 | Principal Component |      |      |      |      |      |      |      |
|-------------------------------------------------|---------------------|------|------|------|------|------|------|------|
|                                                 | 1                   | 2    | 3    | 4    | 5    | 6    | 7    | 8    |
| Ethylbenzene(EB)                                | .893                | .277 |      |      |      |      |      |      |
| o-Xylene(oX)                                    | .889                | .348 |      |      |      |      |      |      |
| p-Xylene(pX)                                    |                     | .923 |      |      |      |      |      |      |
| m-Xylene(mX)                                    | .974                |      |      |      |      |      |      |      |
| D-(+)-Alpha-pinene( $\alpha$ P)                 | .720                | .554 |      |      |      |      |      |      |
| D-limonene(Dl)                                  |                     |      |      |      |      | .932 |      |      |
| Ethanol, 2-butoxy-(E2B)                         | .430                | .537 |      |      |      | .248 | .282 |      |
| Linalool(Linl)                                  | .917                |      |      |      |      |      |      |      |
| Isocaryophyllene(Icrpn)                         |                     |      | .791 |      |      |      |      |      |
| 5,9-undecadien-2-one,6,10-dimethyl (UD)         |                     |      | .368 | .632 |      | .446 |      | .252 |
| (E)-Nerolidol(EN)                               |                     |      |      |      |      |      | .233 |      |
| $\beta$ -Farnesene( $\beta$ F)                  |                     |      |      | .311 |      |      |      |      |
| (-)-Spathulenol(SP)                             | .418                | .267 |      | .357 |      | .509 | .246 |      |
| Cis-p-metha-1(7)-8-dien-2-ol(zMD)               |                     |      |      |      | .961 |      |      |      |
| 1,4-dihydroxy-p-menth-2-ene (Dm)                | .431                |      | .470 | .440 |      |      |      |      |
| (E,E)-Cosmene (Do)                              |                     |      | .823 |      |      |      |      |      |
| 3-cyclohexen-1-carboxaldehyde,3,4-dimethyl(ccd) |                     | .754 |      | .561 |      |      |      |      |
| Hexadecane(Hxd)                                 | .938                |      |      |      |      |      |      |      |
| Isoaromadendrene epoxide(Isamdn)                |                     |      | .307 |      | .811 |      |      |      |
| $\beta$ - Springene( $\beta$ S)                 |                     |      |      | .851 |      |      |      |      |
| Farnesol(Fnso)                                  | .518                | .602 |      |      | .344 |      | .229 |      |
| $\alpha$ -Springene( $\alpha$ Sp)               | .248                | .230 |      |      | .239 |      | .291 | .635 |
| Farnesol(E)-methylether(FnsoEm)                 |                     |      |      |      |      |      |      |      |

**Table S2: Pearson correlation table of major components**

|    |                     | Pearson Correlations |        |      |        |           |           |        |             |        |
|----|---------------------|----------------------|--------|------|--------|-----------|-----------|--------|-------------|--------|
|    |                     | EB                   | OX     | pX   | mX     | $\beta$ F | $\beta$ S | Fnso   | $\alpha$ Sp | FnsoEm |
| EB | Pearson Correlation | 1                    | .974** | .251 | .946** | -.215     | -.053     | .503*  | .268        | .060   |
|    | Sig. (1-tailed)     |                      | .000   | .150 | .000   | .189      | .415      | .014   | .134        | .404   |
|    | N                   | 19                   | 19     | 19   | 19     | 19        | 19        | 19     | 19          | 19     |
| OX | Pearson Correlation | .974**               | 1      | .305 | .925** | -.248     | -.089     | .587** | .322        | .016   |
|    | Sig. (1-tailed)     | .000                 |        | .102 | .000   | .153      | .358      | .004   | .089        | .474   |
|    | N                   | 19                   | 19     | 19   | 19     | 19        | 19        | 19     | 19          | 19     |
| pX | Pearson Correlation | .251                 | .305   | 1    | .009   | -.107     | -.224     | .611** | .347        | -.197  |
|    | Sig. (1-tailed)     | .150                 | .102   |      | .486   | .331      | .178      | .003   | .073        | .210   |
|    | N                   | 19                   | 19     | 19   | 19     | 19        | 19        | 19     | 19          | 19     |
| mX | Pearson Correlation | .946**               | .925** | .009 | 1      | -.247     | -.110     | .431*  | .221        | .070   |
|    | Sig. (1-tailed)     | .000                 | .000   | .486 |        | .154      | .327      | .033   | .181        | .389   |

|             |                     |       |        |        |       |       |       |       |       |       |
|-------------|---------------------|-------|--------|--------|-------|-------|-------|-------|-------|-------|
|             | N                   | 19    | 19     | 19     | 19    | 19    | 19    | 19    | 19    | 19    |
| $\beta F$   | Pearson Correlation | -.215 | -.248  | -.107  | -.247 | 1     | .253  | -.217 | .078  | -.072 |
|             | Sig. (1-tailed)     | .189  | .153   | .331   | .154  |       | .148  | .186  | .375  | .384  |
|             | N                   | 19    | 19     | 19     | 19    | 19    | 19    | 19    | 19    | 19    |
| $\beta S$   | Pearson Correlation | -.053 | -.089  | -.224  | -.110 | .253  | 1     | -.246 | -.104 | -.123 |
|             | Sig. (1-tailed)     | .415  | .358   | .178   | .327  | .148  |       | .155  | .336  | .307  |
|             | N                   | 19    | 19     | 19     | 19    | 19    | 19    | 19    | 19    | 19    |
| Fnso        | Pearson Correlation | .503* | .587** | .611** | .431* | -.217 | -.246 | 1     | .403* | -.249 |
|             | Sig. (1-tailed)     | .014  | .004   | .003   | .033  | .186  | .155  |       | .043  | .152  |
|             | N                   | 19    | 19     | 19     | 19    | 19    | 19    | 19    | 19    | 19    |
| $\alpha Sp$ | Pearson Correlation | .268  | .322   | .347   | .221  | .078  | -.104 | .403* | 1     | -.143 |
|             | Sig. (1-tailed)     | .134  | .089   | .073   | .181  | .375  | .336  | .043  |       | .280  |
|             | N                   | 19    | 19     | 19     | 19    | 19    | 19    | 19    | 19    | 19    |
| FnsoEm      | Pearson Correlation | .060  | .016   | -.197  | .070  | -.072 | -.123 | -.249 | -.143 | 1     |
|             | Sig. (1-tailed)     | .404  | .474   | .210   | .389  | .384  | .307  | .152  | .280  |       |
|             | N                   | 19    | 19     | 19     | 19    | 19    | 19    | 19    | 19    | 19    |

\*\* . Correlation is significant at the 0.01 level (1-tailed).

\* . Correlation is significant at the 0.05 level (1-tailed).
